# Supplementary material for: Measuring Fear of Failure
Source: Atypon-hosted journal article supplement (doi:10.1027/2698-1866/a000018), 2021-12-01
Supplement: 2698-1866_a000018_esm1.pdf [file 2698-1866_a000018_esm1.pdf]

## Electronic Supplementary Material 1

### German Version of the PFAI

Im Folgenden werden Sie mit einigen Aussagen konfrontiert, die sich auf ihr Studium beziehen sollen. Bitte geben Sie an, inwiefern diese auf Sie zutreffen. (trifft überhaupt nicht zu – trifft vollkommen zu; 5er-Skala)

#### Die Angst davor, Scham und Peinlichkeit zu erleben. (FSE)

10. Wenn ich nicht erfolgreich bin, bin ich weniger wert, als wenn ich Erfolg habe.
15. Wenn ich nicht erfolgreich bin, mache ich mich schnell selbst herunter.
18. Wenn ich versage, ist es peinlich, wenn Andere dabei sind und es mitbekommen.
20. Wenn ich versage, bin ich davon überzeugt, dass alle wissen, dass ich versage.
22. Wenn ich versage, glaube ich, dass diejenigen, die an mir zweifeln, sich in ihrer Einschätzung bestätigt fühlen.
24. Wenn ich versage, mache ich mir Sorgen darüber, was Andere über mich denken.
25. Wenn ich versage, mache ich mir Sorgen, dass Andere denken, ich gebe mir keine Mühe.

#### Die Angst davor, sich in der eigenen Selbsteinschätzung abzuwerten. (FDS)

1. Wenn ich versage, passiert das häufig, weil ich nicht schlau genug bin, um erfolgreich zu sein.
4. Wenn ich versage, mache ich meine mangelnde Begabung dafür verantwortlich.
7. Wenn ich versage, befürchte ich, nicht begabt genug zu sein.
16. Wenn ich versage, hasse ich es, wenn ich das Ergebnis nicht beeinflussen kann.

#### Die Angst davor, eine ungewisse Zukunft zu haben. (FUF)

2. Wenn ich versage, scheint mir meine Zukunft ungewiss.
5. Wenn ich versage, glaube ich, dass sich meine Zukunftspläne verändern werden.
8. Wenn ich versage, bringt das meine Pläne für die Zukunft durcheinander.
12. Wenn ich versage, mache ich mir Sorgen, ob dadurch meine Zukunftspläne beeinflusst werden.

#### Die Angst, dass die Menschen, die einem wichtig sind, das Interesse an einem verlieren. (FOL)

11. Wenn ich nicht erfolgreich bin, haben Andere weniger Interesse an mir.
13. Wenn ich nicht erfolgreich bin, scheinen mir Andere weniger helfen zu wollen.
17. Wenn ich nicht erfolgreich bin, neigen Andere dazu, mich allein zu lassen.
21. Wenn ich nicht erfolgreich bin, haben einige Menschen kein Interesse mehr an mir.
23. Wenn ich nicht erfolgreich bin, bin ich für einige Menschen weniger wert.

#### Die Angst davor, die Menschen, die einem wichtig sind zu enttäuschen. (FUO)

3. Wenn ich versage, sind die Menschen, die mir wichtig sind, verärgert.
6. Wenn ich versage, rechne ich damit, dass die Menschen, die mir wichtig sind, mich kritisieren.
9. Wenn ich versage, verliere ich das Vertrauen der Menschen, die mir wichtig sind.
14. Wenn ich versage, sind die Menschen, die mir wichtig sind, nicht glücklich.
19. Wenn ich versage, sind die Menschen, die mir wichtig sind, enttäuscht von mir.
