# Supplementary material for: Measuring Fear of Failure
Source: Atypon-hosted journal article supplement (doi:10.1027/2698-1866/a000018), 2021-12-01
Supplement: 2698-1866_a000018_esm2.pdf [file 2698-1866_a000018_esm2.pdf]

**Electronic Supplementary Material 2 (ESM 2). PFAI item correlation table.**

|            | <b>FSE</b> | <b>10</b> | <b>15</b> | <b>18</b> | <b>20</b> | <b>22</b> | <b>24</b> | <b>25</b> | <b>FDS</b> | <b>1</b> | <b>4</b> | <b>7</b> | <b>16</b> | <b>FUF</b> | <b>2</b> | <b>5</b> | <b>8</b> | <b>12</b> | <b>FOL</b> | <b>11</b> | <b>13</b> | <b>17</b> | <b>21</b> | <b>23</b> | <b>FUO</b> | <b>3</b> | <b>6</b> | <b>9</b> | <b>14</b> | <b>19</b> |  |
|------------|------------|-----------|-----------|-----------|-----------|-----------|-----------|-----------|------------|----------|----------|----------|-----------|------------|----------|----------|----------|-----------|------------|-----------|-----------|-----------|-----------|-----------|------------|----------|----------|----------|-----------|-----------|--|
| <b>FSE</b> | <b>10</b>  | 1         |           |           |           |           |           |           |            |          |          |          |           |            |          |          |          |           |            |           |           |           |           |           |            |          |          |          |           |           |  |
|            | <b>15</b>  | .52**     | 1         |           |           |           |           |           |            |          |          |          |           |            |          |          |          |           |            |           |           |           |           |           |            |          |          |          |           |           |  |
|            | <b>18</b>  | .47**     | .52**     | 1         |           |           |           |           |            |          |          |          |           |            |          |          |          |           |            |           |           |           |           |           |            |          |          |          |           |           |  |
|            | <b>20</b>  | .48**     | .43**     | .56**     | 1         |           |           |           |            |          |          |          |           |            |          |          |          |           |            |           |           |           |           |           |            |          |          |          |           |           |  |
|            | <b>22</b>  | .43**     | .47**     | .50**     | .55**     | 1         |           |           |            |          |          |          |           |            |          |          |          |           |            |           |           |           |           |           |            |          |          |          |           |           |  |
|            | <b>24</b>  | .51**     | .56**     | .70**     | .60**     | .56**     | 1         |           |            |          |          |          |           |            |          |          |          |           |            |           |           |           |           |           |            |          |          |          |           |           |  |
|            | <b>25</b>  | .39**     | .46**     | .53**     | .44**     | .52**     | .60**     | 1         |            |          |          |          |           |            |          |          |          |           |            |           |           |           |           |           |            |          |          |          |           |           |  |
| <b>FDS</b> | <b>1</b>   | .38**     | .33**     | .20**     | .32**     | .23**     | .31**     | .20**     | 1          |          |          |          |           |            |          |          |          |           |            |           |           |           |           |           |            |          |          |          |           |           |  |
|            | <b>4</b>   | .42**     | .47**     | .32**     | .33**     | .34**     | .37**     | .34**     | .53**      | 1        |          |          |           |            |          |          |          |           |            |           |           |           |           |           |            |          |          |          |           |           |  |
|            | <b>7</b>   | .45**     | .55**     | .35**     | .40**     | .35**     | .41**     | .30**     | .49**      | .71**    | 1        |          |           |            |          |          |          |           |            |           |           |           |           |           |            |          |          |          |           |           |  |
|            | <b>16</b>  | .28**     | .51**     | .30**     | .35**     | .31**     | .35**     | .26**     | .26**      | .34**    | .38**    | 1        |           |            |          |          |          |           |            |           |           |           |           |           |            |          |          |          |           |           |  |
| <b>FUF</b> | <b>2</b>   | .42**     | .49**     | .28**     | .37**     | .35**     | .35**     | .36**     | .35**      | .45**    | .50**    | .32**    | 1         |            |          |          |          |           |            |           |           |           |           |           |            |          |          |          |           |           |  |
|            | <b>5</b>   | .37**     | .46**     | .31**     | .40**     | .35**     | .35**     | .36**     | .28**      | .38**    | .40**    | .33**    | .60**     | 1          |          |          |          |           |            |           |           |           |           |           |            |          |          |          |           |           |  |
|            | <b>8</b>   | .28**     | .38**     | .28**     | .36**     | .32**     | .28**     | .29**     | .25**      | .35**    | .39**    | .35**    | .60**     | .79**      | 1        |          |          |           |            |           |           |           |           |           |            |          |          |          |           |           |  |
|            | <b>12</b>  | .33**     | .45**     | .33**     | .35**     | .33**     | .32**     | .36**     | .23**      | .33**    | .40**    | .33**    | .64**     | .74**      | .78**    | 1        |          |           |            |           |           |           |           |           |            |          |          |          |           |           |  |
| <b>FOL</b> | <b>11</b>  | .59**     | .47**     | .44**     | .49**     | .56**     | .49**     | .42**     | .24**      | .31**    | .36**    | .29**    | .34**     | .36**      | .27**    | .32**    | 1        |           |            |           |           |           |           |           |            |          |          |          |           |           |  |
|            | <b>13</b>  | .38**     | .19**     | .27**     | .31**     | .31**     | .27**     | .30**     | .24**      | .20**    | .15**    | .10      | .16**     | .22**      | .17**    | .15**    | .51**    | 1         |            |           |           |           |           |           |            |          |          |          |           |           |  |
|            | <b>17</b>  | .38**     | .18**     | .24**     | .30**     | .31**     | .27**     | .28**     | .12*       | .17**    | .15**    | .13*     | .18**     | .20**      | .14**    | .10      | .48**    | .57**     | 1          |           |           |           |           |           |            |          |          |          |           |           |  |
|            | <b>21</b>  | .39**     | .26**     | .32**     | .39**     | .49**     | .38**     | .40**     | .13*       | .18**    | .16**    | .17**    | .22**     | .28**      | .20**    | .23**    | .68**    | .51**     | .55**      | 1         |           |           |           |           |            |          |          |          |           |           |  |
|            | <b>23</b>  | .52**     | .33**     | .36**     | .41**     | .50**     | .43**     | .37**     | .19**      | .27**    | .26**    | .22**    | .27**     | .26**      | .19**    | .23**    | .62**    | .44**     | .50**      | .67**     | 1         |           |           |           |            |          |          |          |           |           |  |
| <b>FUO</b> | <b>3</b>   | .14**     | .12*      | .09       | .20**     | .24**     | .16**     | .27**     | .17**      | .11      | .03      | .10      | .23**     | .20**      | .23**    | .21**    | .19**    | .26**     | .32**      | .28**     | .26**     | 1         |           |           |            |          |          |          |           |           |  |
|            | <b>6</b>   | .27**     | .30**     | .29**     | .34**     | .35**     | .36**     | .40**     | .13*       | .19**    | .20**    | .25**    | .28**     | .28**      | .27**    | .24**    | .32**    | .28**     | .33**      | .28**     | .24**     | .51**     | 1         |           |            |          |          |          |           |           |  |
|            | <b>9</b>   | .37**     | .20**     | .18**     | .29**     | .25**     | .22**     | .25**     | .12*       | .12*     | .13*     | .09      | .20**     | .24**      | .25**    | .23**    | .44**    | .44**     | .61**      | .43**     | .41**     | .56**     | .41**     | 1         |            |          |          |          |           |           |  |
|            | <b>14</b>  | .20**     | .20**     | .17**     | .26**     | .22**     | .28**     | .26**     | .12*       | .05      | .04      | .24**    | .24**     | .23**      | .23**    | .25**    | .34**    | .31**     | .42**      | .36**     | .38**     | .39**     | .37**     | .40**     | 1          |          |          |          |           |           |  |
|            | <b>19</b>  | .31**     | .27**     | .24**     | .35**     | .29**     | .31**     | .35**     | .12*       | .08      | .07      | .13*     | .19**     | .21**      | .18**    | .19**    | .41**    | .41**     | .49**      | .43**     | .43**     | .57**     | .55**     | .54**     | .58**      | 1        |          |          |           |           |  |

*Note.* \*p < .05, \*\*p < .01. FSE=fear of experiencing shame and embarrassment, FDS=fear of devaluing one's self-estimate, FUF=fear of having an uncertain future, FOL=fear of important others losing interest, FUO=fear of upsetting important others.
